# Supplementary material
Source: HighWire-hosted journal article supplement (https://bmjmedicine.bmj.com/highwire/filestream/395/field_highwire_adjunct_files/0/bmjmed-2022-000215supp001_data_supplement.pdf)
Supplement: bmjmed-2022-000215supp001_data_supplement.pdf [file bmjmed-2022-000215supp001_data_supplement.pdf]

## Supplementary information

|                                                                                                                         |    |
|-------------------------------------------------------------------------------------------------------------------------|----|
| 1. Changes from analysis protocol .....                                                                                 | 2  |
| 2. Definition of comparison groups .....                                                                                | 3  |
| 3. SNOMED concepts used to identify COPD cases in CPRD Aurum .....                                                      | 5  |
| 4. Causal model for selecting confounding variables in analysis of treatment and outcomes after diagnosis of COPD ..... | 8  |
| 5. Characteristics of participants in the base cohort .....                                                             | 9  |
| 6. Definitions and exclusions for outcomes after diagnosis of COPD .....                                                | 10 |
| 7. Sensitivity analysis of outcomes after COPD diagnosis, restricted to current smokers .....                           | 11 |
| 8. Detailed results of survival analysis .....                                                                          | 12 |
| 9. References for supplementary information .....                                                                       | 15 |

## 1. Changes from analysis protocol

This study followed a published protocol. We made the following changes to the protocol:

- a) **Approach to analysis of missing data.** In our protocol,[1] we planned to use a ‘missing indicator’ method in which missing categorical observations are included in analysis with a separate category of ‘missing’, and missing numerical observations are included as zero with a second missing indicator category. We chose to use multiple imputation instead (as described in the methods section) because simulation studies have shown that the ‘missing indicator’ method is likely to be biased.[2,3]
- b) **Sensitivity analysis excluding COPD cases who did not have records of current smoking at diagnosis.** For analyses of outcomes after COPD diagnosis, we did an unplanned sensitivity analysis excluding participants who did not have records of current smoking (i.e. we classified as never-smokers, ex-smokers, or had no records of smoking status). We did this analysis because never-smokers with COPD may have unusual exposures and disease types, and were also more common among cases without a history of using illicit opioids.
- c) **A matching ratio of 1:3 rather than 1:5 in the ‘base cohort’.** In our protocol, we planned to match each participant with a history of using illicit opioids with five patients without a history of using illicit opioids. We reduced this ratio to 1:3 to meet data sharing requirements of the Clinical Practice Research Datalink. As the base cohort was large (106,789 participants with a history of using illicit opioids), this did not affect the power of our analyses. We retained 1:5 matching for the smaller sub-cohort of patients with a COPD diagnosis.

## 2. Definition of comparison groups

This study used two comparison groups: (1) CPRD patients with no records of illicit opioid use; and (2) COPD cases with no records of illicit opioid use at diagnosis. Both comparison groups are drawn from the entire CRPD database (i.e. the second comparison group is not a subset of the first). This is shown in Figure 1 of the main article.

Comparison groups were sampled from CPRD patients who were unexposed (i.e. had no prior records of illicit opioid use) at the date of cohort entry of the corresponding exposed participant. This process is called 'exposure density sampling', [4] and is designed to minimise biases related to the definition of cohort entry. The exposure density sampling procedures are shown in Figure 1 and Figure 2.

Figure 1: Exposure density sampling to create a comparison group of patients without a history of illicit opioid use. Blue crosses represent potential matches from which the unexposed group is sampled

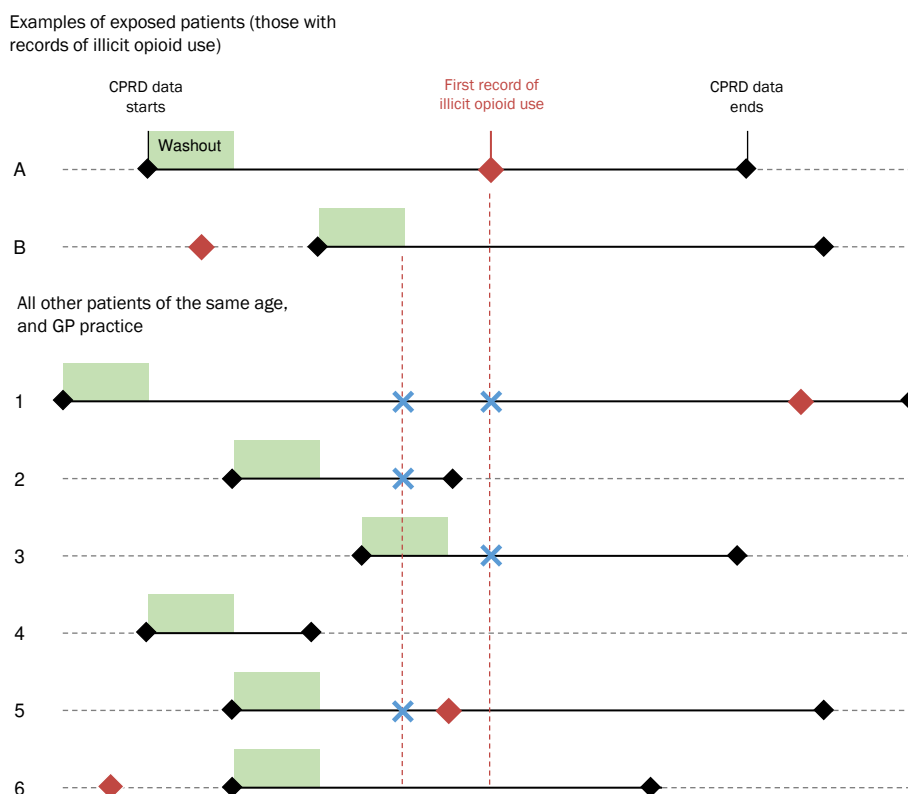

In this figure, participant A joins the cohort when they first use illicit opioids. Participant B has a record of illicit opioid use prior to joining CPRD. The cohort is designed to capture people with a history of illicit opioid use (rather than new opioid use) and therefore participant B is included. They enter the cohort after the washout period, and are matched with patients of the same age and sex who are unexposed on that day. Participant 1 may be matched to both participants A and B, and may therefore be duplicated in the comparison group. Participant 5 may be matched to participant B because they are unexposed at the time when participant B joins the cohort, but will be censored or change exposure status at their first record of illicit opioid use and therefore is not available to be matched with participant A.

Figure 2: Exposure density sampling to create a comparison group of people with a COPD diagnosis but no history of illicit opioid use

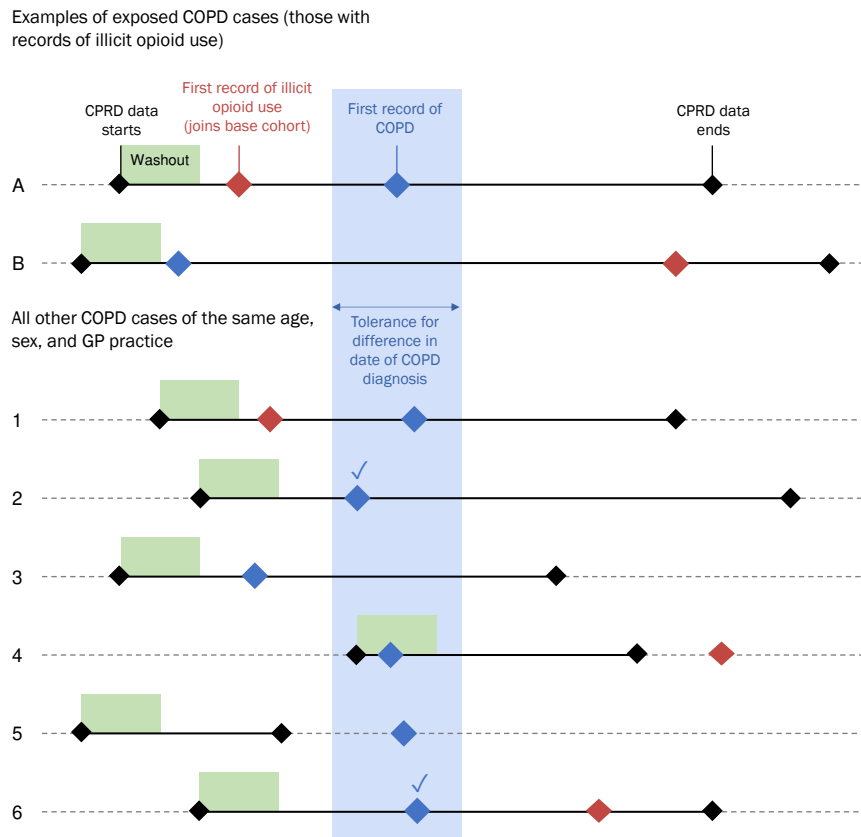

In this example, patient A has a new diagnosis after cohort entry, while patient B has prevalent COPD at cohort entry and is excluded. Ticks represent potential matches from which the unexposed group for patient A is sampled.

### 3. SNOMED concepts used to identify COPD cases in CPRD Aurum

For patients in CPRD Gold, we used a validated definition of COPD.[5] We used this codelist to create a similar codelist for CPRD Aurum, as described in the methods. The SNOMED codes are shown in Table 1 and are also available at:

[https://github.com/danlewer/hupio/blob/main/codelists/aurum\\_copd.csv/](https://github.com/danlewer/hupio/blob/main/codelists/aurum_copd.csv/). Note that numeric codes are prefixed with an 'x' to prevent errors due to class conversion. Once the codes have been read as strings, this 'x' should be removed.

Table 1: SNOMED codes for COPD diagnosis

| MedCodeId          | Term                                                                      |
|--------------------|---------------------------------------------------------------------------|
| x27096010          | Giant bullous emphysema                                                   |
| x105519017         | Chronic bronchitis                                                        |
| x123588010         | Mucopurulent chronic bronchitis                                           |
| x216596014         | End stage chronic obstructive airways disease                             |
| x301456017         | Mixed simple and mucopurulent chronic bronchitis                          |
| x301460019         | Chronic bullous emphysema                                                 |
| x301463017         | Segmental bullous emphysema                                               |
| x301470017         | Acute vesicular emphysema                                                 |
| x457168017         | Mild chronic obstructive pulmonary disease                                |
| x457169013         | Moderate chronic obstructive pulmonary disease                            |
| x475431013         | Chronic obstructive pulmonary disease                                     |
| x506053014         | Purulent chronic bronchitis                                               |
| x508561017         | Simple chronic bronchitis                                                 |
| x1484924013        | Chronic obstructive pulmonary disease monitoring                          |
| x299001000000116   | Chronic obstructive pulmonary disease disturbs sleep                      |
| x885281000006118   | Mucopurulent chr. bronchitis                                              |
| x909721000006115   | [RFC] Emphysema                                                           |
| x1771201000006116  | Chronic obstructive pulmonary disease multidisciplinary review            |
| x1856491000006119  | Chronic obstructive pulmonary disease monitoring in primary care          |
| x1856501000006110  | Chronic obstructive pulmonary disease monitoring secondary care           |
| x1856571000006116  | Chronic obstructive pulmonary disease severity                            |
| x1856591000006115  | Chronic obstructive pulmonary disease follow-up assessment                |
| x1882421000006113  | 1 COPD exacerbation in past year                                          |
| x1882431000006111  | 3+ COPD exacerbations in past year                                        |
| x1882441000006118  | 2 COPD exacerbations in past year                                         |
| x2219861000000114  | Chronic obstructive pulmonary disease rescue pack declined                |
| x2423731000000115  | Telehealth chronic obstructive pulmonary disease monitoring               |
| x2010061000006113  | Acute non-infective exacerbation of chronic obstructive pulmonary disease |
| x19421011          | Interstitial emphysema                                                    |
| x139979010         | Fetid chronic bronchitis                                                  |
| x301444018         | Simple chronic bronchitis NOS                                             |
| x301455018         | Obstructive chronic bronchitis NOS                                        |
| x301458016         | Other chronic bronchitis NOS                                              |
| x301468014         | Chronic bullous emphysema NOS                                             |
| x301477019         | Emphysema NOS                                                             |
| x301545019         | Chronic obstructive airways disease NOS                                   |
| x1222334016        | Other specified chronic obstructive pulmonary disease                     |
| x1222335015        | Chronic obstructive pulmonary disease NOS                                 |
| x553211000006119   | Chron obstruct pulmonary dis wth acute exacerbation, unspec               |
| x555461000006119   | Chronic obstruct pulmonary dis with acute lower resp infectn              |
| x977891000006112   | COPD accident and emergency attendance since last visit                   |
| x998281000006115   | Multiple COPD emergency hospital admissions                               |
| x1704531000006115  | COPD patient unsuitable for pulmonary rehab - enh serv admin              |
| x1704541000006113  | COPD patient unsuitable for pulmonary rehabilitation                      |
| x1783891000006115  | Chronic obstructiv pulmonary disease medication optimisation              |
| x1784071000006113  | Preferred place of care for next exacerbation of COPD                     |
| x1811661000006110  | COPD self-management plan agreed                                          |
| x1885981000006112  | Chronic obstructive pulmon dis wr self managem plan declined              |
| x301469018         | Other emphysema                                                           |
| x11932351000006110 | COPD GOLD group C                                                         |
| x11932361000006112 | COPD GOLD group D                                                         |
| x2160051010        | Admit COPD emergency                                                      |
| x8312921000006111  | COPD (chronic obstructive pulmonary disease) management plan declined     |
| x4733031000006114  | Chronic obstructive bronchitis                                            |
| x2716351000006113  | COLD - Chronic obstructive lung disease                                   |
| x7484341000006112  | Optimization of medication for chronic obstructive lung disease           |
| x4781461000006117  | Emphysematous bulla                                                       |
| x4733011000006115  | COB - Chronic obstructive bronchitis                                      |

| MedCodeId          | Term                                                                                         |
|--------------------|----------------------------------------------------------------------------------------------|
| x4781421000006111  | Acute exacerbation of COPD                                                                   |
| x8260631000006112  | COPD (chronic obstructive pulmonary disease) self-management plan review                     |
| x8294671000006116  | COPD (chronic obstructive pulmonary disease) written self management plan declined           |
| x9317331000006113  | Asthma-COPD overlap syndrome (ACOS)                                                          |
| x4733021000006111  | Obstructive chronic bronchitis                                                               |
| x4732991000006119  | Chronic bronchitis with emphysema                                                            |
| x4781431000006114  | Acute exacerbation of chronic obstructive pulmonary disease                                  |
| x3764021000006117  | Interstitial emphysema of lung                                                               |
| x8316481000006116  | Shared care COPD (chronic obstructive pulmonary disease) monitoring                          |
| x8125721000006119  | At risk of COPD (chronic obstructive pulmonary disease) exacerbation                         |
| x12489801000006116 | Admit COPD emergency                                                                         |
| x2716321000006116  | COPD - Chronic obstructive pulmonary disease                                                 |
| x6763231000006119  | Emergency hospital admission for chronic obstructive pulmonary disease                       |
| x3921361000006112  | Emphysema of lung                                                                            |
| x12704691000006117 | Interstitial emphysema                                                                       |
| x12759361000006112 | Chronic obstructive pulmonary disease NOS                                                    |
| x285104011         | Obstructive chronic bronchitis                                                               |
| x301539010         | Other specified chronic obstructive airways disease                                          |
| x1880061000006110  | COPD management plan declined                                                                |
| x1765681000000110  | History of chronic obstructive pulmonary disease                                             |
| x1573111000000115  | Issue of chronic obstructive pulmonary disease rescue pack                                   |
| x516801000000112   | Very severe chronic obstructive pulmonary disease                                            |
| x1813871000006117  | On chronic obstructive pulmonary disease supprtvr cre pathway                                |
| x11932341000006113 | COPD GOLD group B                                                                            |
| x977911000006114   | Number of COPD exacerbations in past year                                                    |
| x7484351000006114  | Optimisation of medication for chronic obstructive lung disease                              |
| x457581000006111   | Acute interstitial emphysema                                                                 |
| x4781471000006112  | Bullous emphysema                                                                            |
| x5516841000006119  | History of chronic obstructive airway disease                                                |
| x2716231000006114  | Chronic obstructive lung disease                                                             |
| x6763251000006114  | Emergency hospital admission for COPD (chronic obstructive pulmonary disease)                |
| x7484331000006119  | Optimization of medication for chronic obstructive pulmonary disease                         |
| x8235101000006114  | COPD (chronic obstructive pulmonary disease) 3 monthly review                                |
| x12728161000006116 | Chronic obstructive airways disease NOS                                                      |
| x8235131000006118  | COPD (chronic obstructive pulmonary disease) 6 monthly review                                |
| x1656601000006119  | COPD patient unsuitable for pulmonary rehabilitation                                         |
| x909711000006111   | [RFC] Chronic obstructive pulmonary disease (COPD)                                           |
| x851261000006116   | Chronic bronchitis, acute exac                                                               |
| x1780380013        | Chronic obstructive pulmonary disease monitoring by nurse                                    |
| x1780381012        | Chronic obstructive pulmonary disease monitoring by doctor                                   |
| x1488424013        | Chronic obstructive pulmonary disease annual review                                          |
| x457171013         | Severe chronic obstructive pulmonary disease                                                 |
| x301450011         | Chronic asthmatic bronchitis                                                                 |
| x301451010         | Chronic wheezy bronchitis                                                                    |
| x301464011         | Zonal bullous emphysema                                                                      |
| x977901000006111   | Emergency COPD admission since last appointment                                              |
| x8120981000006112  | COPD (Chronic obstructive pulmonary disease) patient unsuitable for pulmonary rehabilitation |
| x8058301000006110  | COPD (chronic obstructive pulmonary disease) disturbs sleep                                  |
| x9317341000006115  | ACOS - asthma-chronic obstructive pulmonary disease overlap syndrome                         |
| x301448015         | Mucopurulent chronic bronchitis NOS                                                          |
| x3011135010        | Step down change in chronic obstructive pulmonary disease management plan                    |
| x424365019         | Acute infective exacerbation of chronic obstructive airways disease                          |
| x2009451000006113  | Chronic obstructive pulmonary disease post discharge review                                  |
| x1882371000006118  | Shared care chronic obstructive pulmonary disease monitoring                                 |
| x1683181000000112  | Chronic obstructive pulmonary disease 3 monthly review                                       |
| x508562012         | Chronic catarrhal bronchitis                                                                 |
| x1488423019        | Chronic obstructive pulmonary disease follow-up                                              |
| x396108018         | Bullous emphysema with collapse                                                              |
| x301453013         | Acute exacerbation of chronic obstructive airways disease                                    |
| x1813881000006119  | On COPD (chr obstruc pulmonary disease) supportvr cre pathway                                |
| x1948051000006112  | Asthma-chronic obstructive pulmonary disease overlap syndrom                                 |
| x301835010         | [X]Other emphysema                                                                           |
| x396110016         | Other emphysema NOS                                                                          |
| x11932331000006115 | COPD GOLD group A                                                                            |
| x8294651000006114  | COPD (chronic obstructive pulmonary disease) rescue pack declined                            |
| x4510801000006114  | End stage chronic obstructive pulmonary disease                                              |
| x8219501000006114  | Issue of COPD (chronic obstructive pulmonary disease) rescue pack                            |
| x3764031000006119  | Interstitial pulmonary emphysema                                                             |
| x1683221000000119  | Chronic obstructive pulmonary disease 6 monthly review                                       |
| x2152091000000112  | Has chronic obstructive pulmonary disease care plan                                          |
| x2308511000000113  | Shared care chronic obstructive pulmonary disease monitoring                                 |
| x1823851000006119  | Chronic obstructive pulmonary disease confirmed                                              |
| x8287171000006115  | Acute non-infective exacerbation of COPD (chronic obstructive pulmonary disease)             |
| x301572010         | Chronic emphysema due to chemical fumes                                                      |
| x87480013          | Chronic tracheobronchitis                                                                    |
| x1904861000006117  | Chronic obstruct pulmonary disease management plan declined                                  |
| x301457014         | Other chronic bronchitis                                                                     |
| x301459012         | Chronic bronchitis NOS                                                                       |
| x301836011         | [X]Other specified chronic obstructive pulmonary disease                                     |
| x555471000006114   | Chronic obstructive airways disease                                                          |
| x640491000006111   | Emphysema                                                                                    |

| MedCodeId         | Term                                                                                                                    |
|-------------------|-------------------------------------------------------------------------------------------------------------------------|
| x966841000006111  | Chronic obstructive pulmonary disease clini management plan                                                             |
| x3873191000006110 | Fetid chronic bronchitis                                                                                                |
| x8244871000006114 | GP (general practitioner) OOH (out of hours) service notified of COPD (chronic obstructive pulmonary disease) care plan |

## 4. Causal model for selecting confounding variables in analysis of treatment and outcomes after diagnosis of COPD

We used a causal model to select confounding variables in our analysis of treatment and outcomes after diagnosis of COPD. This model is shown in Figure 3.

Figure 3: Causal model showing how a history of illicit opioid use may affect the probability of treatment and adverse outcomes after a diagnosis of chronic obstructive pulmonary disease

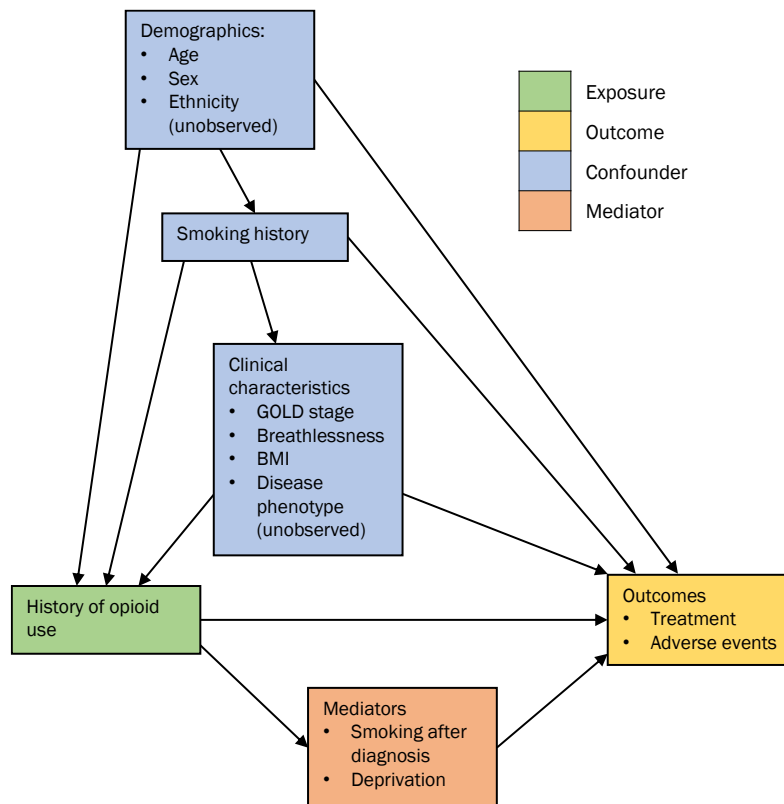



## 5. Characteristics of participants in the base cohort

The main article includes a table showing the characteristics of participants with a new diagnosis of COPD. Table 2 shows the characteristics of the 'base cohort'.

Table 2: Characteristics of participants in the base cohort

| Variable                             | Level                         | History of using illicit opioids<br>n (%) | Comparison group<br>n (%) |
|--------------------------------------|-------------------------------|-------------------------------------------|---------------------------|
| Total                                |                               | 106,789 (100.0)                           | 320,367 (100.0)           |
| Years of follow-up (linked data)*    | Median [IQR]                  | 8.7 [4.3-13.5]                            | 9.5 [5.0-14.4]            |
| Years of follow-up (CPRD)*           | Median [IQR]                  | 3.2 [1.2-7.3]                             | 5.5 [2.5-10.4]            |
| Age at cohort entry, years           | Median [IQR]                  | 35.1 [29.0-42.3]                          | 35.1 [29.0-42.4]          |
| Sex                                  | Male                          | 73,791 (69.1)                             | 221,373 (69.1)            |
|                                      | Female                        | 32,998 (30.9)                             | 98,994 (30.9)             |
| Body mass index (kg/m <sup>2</sup> ) | Underweight (<18.5)           | 5,463 (5.1)                               | 6,827 (2.1)               |
|                                      | Healthy [18.5-25)             | 44,389 (41.6)                             | 105,814 (33.0)            |
|                                      | Overweight [25-30)            | 20,339 (19.0)                             | 83,682 (26.1)             |
|                                      | Obese [30-40)                 | 11,127 (10.4)                             | 48,735 (15.2)             |
|                                      | Severely obese (40+)          | 1,779 (1.7)                               | 7,195 (2.2)               |
|                                      | Missing                       | 23,692 (22.2)                             | 68,114 (21.3)             |
|                                      | Median [IQR]                  | 23.7 [21.0-27.5]                          | 25.6 [22.7-29.3]          |
|                                      | Mean [sd]                     | 24.9 [5.6]                                | 26.6 [5.7]                |
| Smoking at index                     | Never                         | 7,261 (6.8)                               | 146,342 (45.7)            |
|                                      | Ex                            | 7,043 (6.6)                               | 39,818 (12.4)             |
|                                      | Current                       | 83,486 (78.2)                             | 107,846 (33.7)            |
|                                      | Missing                       | 8,999 (8.4)                               | 26,361 (8.2)              |
| Index of multiple deprivation        | 1 - Least deprived            | 7,412 (6.9)                               | 44,051 (13.8)             |
|                                      | 2                             | 11,361 (10.6)                             | 52,047 (16.2)             |
|                                      | 3                             | 16,339 (15.3)                             | 57,411 (17.9)             |
|                                      | 4                             | 26,090 (24.4)                             | 73,151 (22.8)             |
|                                      | 5 - Most deprived             | 45,396 (42.5)                             | 93,268 (29.1)             |
|                                      | Missing                       | 191 (0.2)                                 | 439 (0.1)                 |
| Prevalent COPD                       |                               | 2,431 (2.3)                               | 1,368 (0.4)               |
| Deaths due to COPD                   | Number [rate per 100,000 PYs] | 680 [71]                                  | 160 [6]                   |
| Incident COPD                        | Number [rate per 100,000 PYs] | 4,016 [799]                               | 3,051 [153]               |

\* Follow-up for 'linked data' refers to follow-up until the final date when externally linked data (i.e. ONS mortality and Hospital Episode Statistics) is available; while follow-up for 'CPRD' refers to follow-up until the final date when primary care data (used for diagnosis of COPD) is available.  
PYs = person-years

## 6. Definitions and exclusions for outcomes after diagnosis of COPD

Our analysis of outcomes after diagnosis of COPD (using the 'sub-cohort' of patients diagnosed with COPD, as described in the methods section) includes 5 treatment-related outcomes and 4 adverse outcomes. Definitions of each outcome and exclusion criteria (patients who are considered ineligible for the treatment and therefore excluded from analysis) are shown in Table 3. More detailed codelists are included in the study protocol.[1]

Table 3: Definitions and exclusion criteria for outcomes after diagnosis of COPD

| Type             | Outcome                                                         | Prescriptions and clinical events                                                                                                                                                                                                                                             | Exclusion criteria (ineligible groups)                                            |
|------------------|-----------------------------------------------------------------|-------------------------------------------------------------------------------------------------------------------------------------------------------------------------------------------------------------------------------------------------------------------------------|-----------------------------------------------------------------------------------|
| Treatment        | Seasonal influenza vaccine                                      | <ul style="list-style-type: none"> <li>• Prescription of vaccine</li> <li>• Record of vaccine given in another setting</li> </ul>                                                                                                                                             | None                                                                              |
|                  | Pneumococcal vaccine                                            | <ul style="list-style-type: none"> <li>• Prescription of vaccine</li> <li>• Record of vaccine given in another setting</li> </ul>                                                                                                                                             | Patients with a pneumococcal vaccine before diagnosis of COPD                     |
|                  | Pulmonary rehabilitation                                        | <ul style="list-style-type: none"> <li>• Pulmonary rehabilitation class</li> <li>• Referral for pulmonary rehabilitation</li> </ul>                                                                                                                                           | None                                                                              |
|                  | COPD-specific medication                                        | <ul style="list-style-type: none"> <li>• Inhaled corticosteroids</li> <li>• Bronchodilators</li> </ul>                                                                                                                                                                        | None                                                                              |
|                  | Smoking cessation support                                       | <ul style="list-style-type: none"> <li>• Referral to a specialist stop smoking team</li> <li>• Prescription of varenicline</li> <li>• Prescription of bupropion</li> <li>• Prescription of nicotine replacement therapy</li> <li>• Delivery of behavioural support</li> </ul> | Patients who do not have records of current smoking at the time of COPD diagnosis |
| Adverse outcomes | Hospitalised exacerbations (based on a validated definition[6]) | <ul style="list-style-type: none"> <li>• Hospital admission with a primary diagnosis of COPD (ICD-10 J41-J44)</li> <li>• Hospital admission with acute infection or acute exacerbation in any diagnosis position (J44.0 or J44.1)</li> </ul>                                  | None                                                                              |
|                  | Unplanned hospital admissions for respiratory disease           | <ul style="list-style-type: none"> <li>• Hospital admission where the primary diagnosis is a respiratory disease (ICD-10 J00-J99) and the method of admission is "emergency"</li> </ul>                                                                                       | None                                                                              |
|                  | All-cause death                                                 | <ul style="list-style-type: none"> <li>• Any death identified in linked Office for National Statistics mortality data</li> </ul>                                                                                                                                              | None                                                                              |
|                  | Deaths due to respiratory disease                               | <ul style="list-style-type: none"> <li>• Deaths identified in linked Office for National Statistics mortality data with an underlying cause of respiratory disease (ICD-10 J00-J99)</li> </ul>                                                                                | None                                                                              |

## 7. Sensitivity analysis of outcomes after COPD diagnosis, restricted to current smokers

We did a sensitivity analysis restricted to COPD cases with records of current smoking at diagnosis, because never-smokers may have different exposures (for example may have more genetic risk factors for COPD) and disease phenotypes, and may be more common among the comparison group. The results of this sensitivity analysis are shown in Figure 4.

Figure 4: Associations between use of illicit opioids and outcomes after COPD diagnosis, comparing the main analysis with a sensitivity analysis restricted to current smokers. Values are hazard ratios (95% CI)

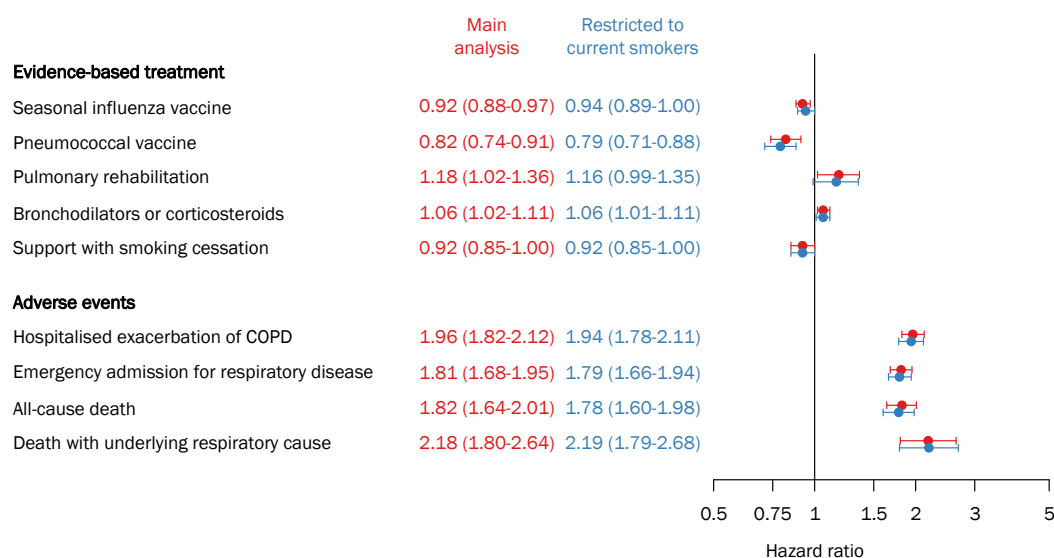

## 8. Detailed results of survival analysis

We used survival analysis to compare time-to-COPD-related death and time-to-COPD-diagnosis by opioid use status. The Kaplan-Meier curves are shown in Figure 5 and Figure 6, and the hazard ratios including covariates are shown in Table 4 and Table 5. We did not present the covariate coefficients in the main article because they are not the focus of this study, and the adjustment strategy may not be appropriate (ie., they may be subject to the “table 2 fallacy”).

Figure 5: Kaplan-Meier estimates of the cumulative hazard of death with an underlying cause of COPD, comparing participants with and without a history of using illicit opioids (shaded area shows 95% confidence interval)

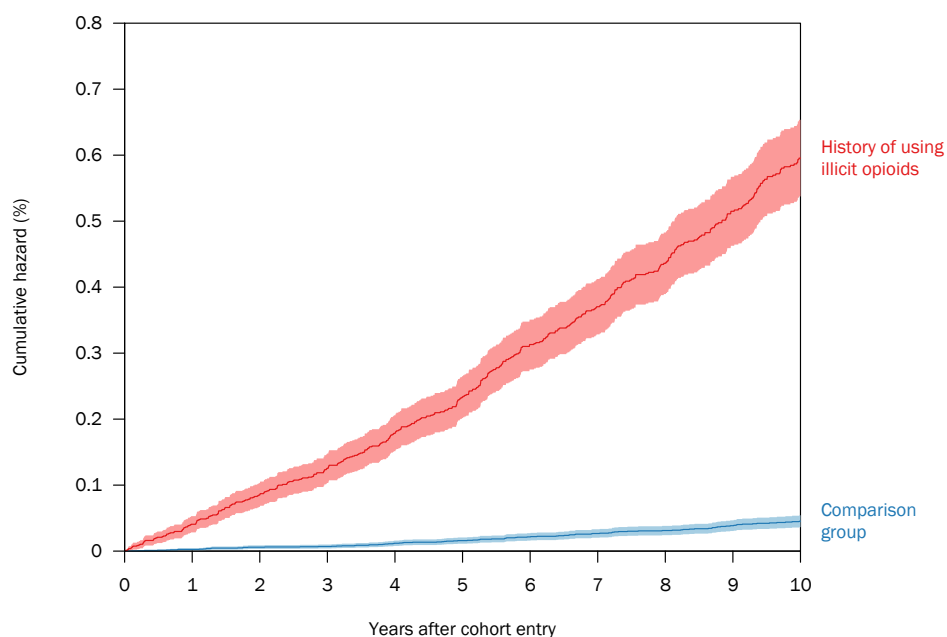

Number at risk (thousands)

|            |     |     |     |     |     |     |     |     |     |     |     |
|------------|-----|-----|-----|-----|-----|-----|-----|-----|-----|-----|-----|
| Opioids    | 107 | 100 | 94  | 88  | 82  | 76  | 70  | 63  | 58  | 51  | 45  |
| Comparison | 320 | 304 | 290 | 275 | 258 | 240 | 223 | 206 | 188 | 170 | 152 |

Table 4: Hazard ratio of death with underlying cause of COPD (95% CI)

| Variable                   | Level       | Adjusted for age and sex only | Fully adjusted          |
|----------------------------|-------------|-------------------------------|-------------------------|
| History of illicit opioids |             | 14.59 (12.28-17.33)           | 8.81 (7.36-10.54)       |
| Age group                  | Under 25    | 4.26 (0.78-23.31)             | 4.71 (0.86-25.76)       |
|                            | 25-34 (ref) | 1                             | 1                       |
|                            | 35-44       | 13.58 (4.98-37.03)            | 13.75 (5.04-37.51)      |
|                            | 45-54       | 67.67 (25.16-182.03)          | 74.02 (27.51-199.14)    |
|                            | 55-64       | 272.78 (101.60-732.39)        | 343.89 (128.03-923.68)  |
|                            | 65+         | 469.37 (173.50-1269.84)       | 763.62 (281.94-2068.27) |
| Female sex                 |             | 1.03 (0.89-1.19)              | 1.09 (0.94-1.26)        |
| Smoking                    | Never (ref) | 1                             | 1                       |
|                            | Ex          | 6.59 (4.27-10.18)             | 4.66 (3.01-7.22)        |
|                            | Current     | 20.13 (13.89-29.18)           | 8.12 (5.55-11.90)       |

Figure 6: Kaplan-Meier estimates of the cumulative hazard of new COPD diagnosis, comparing participants with and without a history of using illicit opioids (shaded area shows 95% confidence interval)

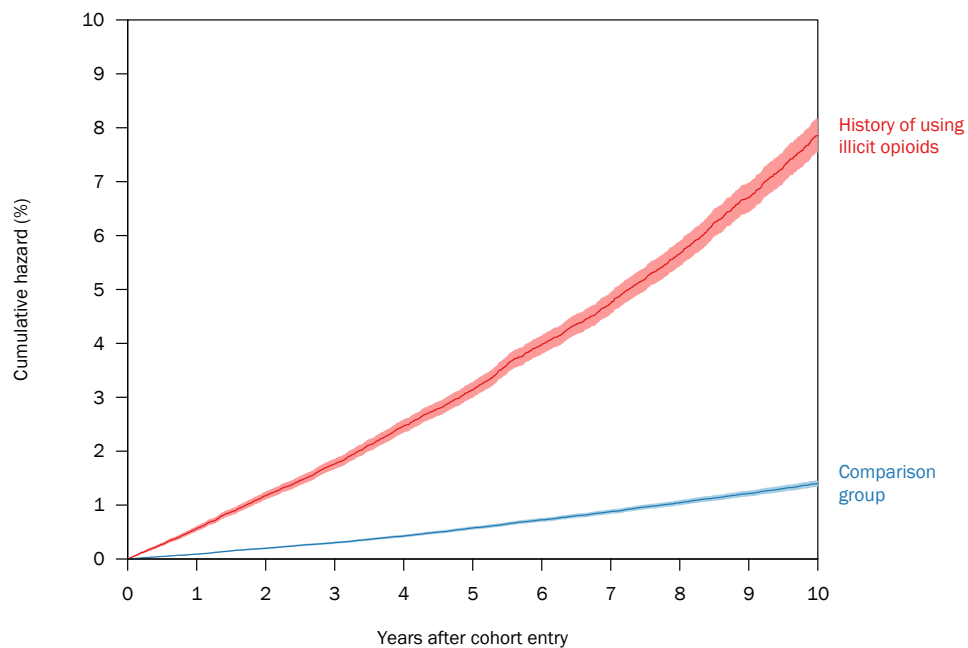

Number at risk (thousands)

|            |     |     |     |     |     |     |     |     |     |    |    |
|------------|-----|-----|-----|-----|-----|-----|-----|-----|-----|----|----|
| Opioids    | 102 | 81  | 66  | 54  | 45  | 37  | 31  | 26  | 22  | 19 | 16 |
| Comparison | 314 | 285 | 253 | 222 | 195 | 170 | 149 | 130 | 112 | 98 | 84 |

Table 5: Hazard ratio of diagnosis of COPD (95% CI)

| Variable                   | Level       | Adjusted for age and sex only | Fully adjusted      |
|----------------------------|-------------|-------------------------------|---------------------|
| History of illicit opioids |             | 5.89 (5.62-6.18)              | 3.29 (3.13-3.46)    |
| Age group                  | Under 25    | 0.23 (0.10-0.51)              | 0.24 (0.11-0.54)    |
|                            | 25-34 (ref) | 1                             | 1                   |
|                            | 35-44       | 6.10 (5.24-7.10)              | 6.29 (5.40-7.33)    |
|                            | 45-54       | 16.37 (14.09-19.02)           | 18.60 (16.01-21.61) |
|                            | 55-64       | 29.92 (25.70-34.85)           | 39.16 (33.62-45.62) |
|                            | 65+         | 30.74 (25.92-36.45)           | 48.19 (40.61-57.18) |
| Female sex                 |             | 1.13 (1.07-1.18)              | 1.27 (1.21-1.34)    |
| Smoking                    | Never (ref) | 1                             | 1                   |
|                            | Ex          | 4.02 (3.56-4.55)              | 3.52 (3.11-3.98)    |
|                            | Current     | 13.97 (12.68-15.39)           | 9.00 (8.14-9.94)    |

## 9. References for supplementary information

- 1 Lewer D, Denaxas S, Gonzalez-Izquierdo A, *et al.* Incidence of COPD and quality of subsequent treatment among people with a history of using illicit opioids: a cohort study in England (PROTOCOL). 2021.<https://doi.org/10.5522/04/14207687.v1>
- 2 Pedersen A, Mikkelsen E, Cronin-Fenton D, *et al.* Missing data and multiple imputation in clinical epidemiological research. *Clin Epidemiol* 2017;**Volume 9**:157–66. doi:10.2147/CLEP.S129785
- 3 Greenland S, Finkle WD. A Critical Look at Methods for Handling Missing Covariates in Epidemiologic Regression Analyses. *Am J Epidemiol* 1995;**142**:1255–64. doi:10.1093/oxfordjournals.aje.a117592
- 4 Ohneberg K, Beyersmann J, Schumacher M. Exposure density sampling: Dynamic matching with respect to a time-dependent exposure. *Stat Med* 2019;**38**:4390–403. doi:10.1002/sim.8305
- 5 Quint JK, Mullerova H, DiSantostefano RL, *et al.* Validation of chronic obstructive pulmonary disease recording in the Clinical Practice Research Datalink (CPRD-GOLD). *BMJ Open* 2014;**4**:e005540–e005540. doi:10.1136/bmjopen-2014-005540
- 6 Rothnie KJ, Müllerová H, Thomas SL, *et al.* Recording of hospitalizations for acute exacerbations of COPD in UK electronic health care records. *Clin Epidemiol* 2016;**Volume 8**:771–82. doi:10.2147/CLEP.S117867
